# Supplementary material
Source: PubMed Central journal article supplement (PMC3359393)
Supplement: NIHMS360864-supplement-02.pdf [file NIHMS360864-supplement-02.pdf]

Paik & Jang, Appendix A  
 Supplementary Table 1

| Cross direction (F x M) | Sex of F1 progeny | Group                 | N   | Mean (d)    | ILS (B/A)   | Log-Rank Test     |
|-------------------------|-------------------|-----------------------|-----|-------------|-------------|-------------------|
| da-GS x UAS-CG33138     | Male              | RU (0), control (A)   | 115 | 45.7        | -           | -                 |
|                         |                   | RU (50 $\mu$ M), (B)  | 221 | 44.7        | 0.98        | 0.0761            |
|                         |                   | RU (100 $\mu$ M), (B) | 194 | 42.5        | 0.93        | 0.9128            |
|                         |                   | RU (200 $\mu$ M), (B) | 195 | <b>47.7</b> | <b>1.04</b> | <b>0.0028</b>     |
|                         | Female            | RU (0), control (A)   | 214 | 44.7        | -           | -                 |
|                         |                   | RU (50 $\mu$ M), (B)  | 196 | <b>49.1</b> | <b>1.10</b> | <b>0.0185</b>     |
|                         |                   | RU (100 $\mu$ M), (B) | 198 | <b>53.3</b> | <b>1.19</b> | <b>0.0004</b>     |
|                         |                   | RU (200 $\mu$ M), (B) | 197 | <b>53.7</b> | <b>1.20</b> | <b>&lt;0.0001</b> |
| S106-GS x UAS-CG33138   | Male              | RU (0), control (A)   | 290 | 57.5        | -           | -                 |
|                         |                   | RU (200 $\mu$ M), (B) | 347 | 59.2        | 1.03        | 0.559             |
|                         | Female            | RU (0), control (A)   | 341 | <b>52.3</b> | -           | -                 |
|                         |                   | RU (200 $\mu$ M), (B) | 322 | <b>55.2</b> | <b>1.06</b> | <b>0.013</b>      |
