# Supplementary material
Source: PubMed Central journal article supplement (PMC3359393)
Supplement: NIHMS360864-supplement-03.pdf [file NIHMS360864-supplement-03.pdf]

Paik & Jang, Appendix B  
Supplementary Table 2

**Males**

| Trial | Background (1) | Cross direction (F x M) | Group            | N   | Mean (d)     | SE   | Quartiles (2) |           |           |              |              | Log-Rank Test (3) |                   |
|-------|----------------|-------------------------|------------------|-----|--------------|------|---------------|-----------|-----------|--------------|--------------|-------------------|-------------------|
|       |                |                         |                  |     |              |      | Median (d)    | Lower 95% | Upper 95% | 25% Failures | 75% Failures | $\chi^2$          | $P>\chi^2$        |
| A     | Honegger       | S106-GS x UAS-Impl2     | RU (200 $\mu$ M) | 311 | <b>76.87</b> | 0.72 | 80            | 78        | 80        | 72           | 86           | <b>204.1103</b>   | <b>&lt;0.0001</b> |
|       |                |                         | RU (0), control  | 311 | <b>67.31</b> | 0.72 | 70            | 68        | 72        | 64           | 76           |                   |                   |
| B     | Honegger       | S106-GS x UAS-Impl2     | RU (200 $\mu$ M) | 373 | 71.40        | 1.14 | 78            | 74        | 80        | 58           | 88           | 1.3438            | 0.2464            |
|       |                |                         | RU (0), control  | 342 | 71.46        | 1.08 | 76            | 72        | 80        | 58           | 88           |                   |                   |
| B     | Honegger       | UAS-Impl2 x S106-GS     | RU (200 $\mu$ M) | 343 | <b>78.08</b> | 1.05 | 84            | 83        | 86        | 74           | 90           | <b>70.0803</b>    | <b>&lt;0.0001</b> |
|       |                |                         | RU (0), control  | 319 | <b>71.02</b> | 0.87 | 72            | 70        | 74        | 64           | 82           |                   |                   |
| B     | wDah           | S106-GS x UAS-Impl2     | RU (200 $\mu$ M) | 295 | <b>81.55</b> | 0.92 | 88            | 86        | 88        | 80           | 90           | <b>156.7641</b>   | <b>&lt;0.0001</b> |
|       |                |                         | RU (0), control  | 333 | <b>68.94</b> | 0.89 | 74            | 72        | 74        | 58           | 80           |                   |                   |
| B     | wDah           | UAS-Impl2 x S106-GS     | RU (200 $\mu$ M) | 258 | <b>81.07</b> | 0.86 | 86            | 84        | 86        | 78           | 88           | <b>52.1961</b>    | <b>&lt;0.0001</b> |
|       |                |                         | RU (0), control  | 303 | <b>75.53</b> | 0.81 | 80            | 78        | 80        | 72           | 86           |                   |                   |

**Females**

| Trial | Background (1) | Cross direction (F x M) | Group            | N   | Mean (d)     | SE   | Quartiles (2) |           |           |              |              | Log-Rank Test (3) |                   |
|-------|----------------|-------------------------|------------------|-----|--------------|------|---------------|-----------|-----------|--------------|--------------|-------------------|-------------------|
|       |                |                         |                  |     |              |      | Median (d)    | Lower 95% | Upper 95% | 25% Failures | 75% Failures | $\chi^2$          | $P>\chi^2$        |
| A     | Honegger       | S106-GS x UAS-Impl2     | RU (200 $\mu$ M) | 316 | <b>73.30</b> | 0.74 | 74            | 74        | 78        | 68           | 82           | <b>23.5000</b>    | <b>&lt;0.0001</b> |
|       |                |                         | RU (0), control  | 289 | <b>68.13</b> | 0.83 | 68            | 68        | 70        | 62           | 76           |                   |                   |
| B     | Honegger       | S106-GS x UAS-Impl2     | RU (200 $\mu$ M) | 213 | <b>74.18</b> | 1.05 | 76            | 74        | 78        | 70           | 82           | <b>30.6235</b>    | <b>&lt;0.0001</b> |
|       |                |                         | RU (0), control  | 332 | <b>68.23</b> | 0.78 | 70            | 68        | 72        | 60           | 78           |                   |                   |
| B     | Honegger       | UAS-Impl2 x S106-GS     | RU (200 $\mu$ M) | 248 | <b>74.93</b> | 1.18 | 80            | 76        | 80        | 70           | 86           | <b>78.9889</b>    | <b>&lt;0.0001</b> |
|       |                |                         | RU (0), control  | 198 | <b>63.32</b> | 1.18 | 66            | 62        | 68        | 52           | 74           |                   |                   |
| B     | wDah           | S106-GS x UAS-Impl2     | RU (200 $\mu$ M) | 207 | 66.31        | 0.82 | 68            | 68        | 68        | 64           | 74           | 53.1604           | <0.0001           |
|       |                |                         | RU (0), control  | 204 | 71.28        | 1.02 | 74            | 72        | 74        | 66           | 80           |                   |                   |
| B     | wDah           | UAS-Impl2 x S106-GS     | RU (200 $\mu$ M) | 278 | <b>69.67</b> | 0.70 | 72            | 70        | 74        | 64           | 78           | <b>34.0269</b>    | <b>&lt;0.0001</b> |
|       |                |                         | RU (0), control  | 278 | <b>63.10</b> | 0.89 | 66            | 64        | 68        | 56           | 74           |                   |                   |
