# Supplementary material
Source: PubMed Central journal article supplement (PMC3359393)
Supplement: NIHMS360864-supplement-04.pdf [file NIHMS360864-supplement-04.pdf]

Paik & Jang, Appendix C  
Supplementary Table 3

| EP line                                | Gene                  | + <sup>CS10</sup> / <sub>+<sup>CS10</sup></sub> vs.          |                                                         | + <sup>CS10</sup> / <sub>+<sup>CS10</sup></sub> vs. |                                              | B/A         |
|----------------------------------------|-----------------------|--------------------------------------------------------------|---------------------------------------------------------|-----------------------------------------------------|----------------------------------------------|-------------|
|                                        |                       | <i>da-Gal4</i> <sup>CS10</sup> / <sub>+<sup>CS10</sup></sub> | <i>EP</i> <sup>CS10</sup> / <sub>+<sup>CS10</sup></sub> | <i>X</i> <sup>2</sup> test<br><i>p</i> value        | <i>X</i> <sup>2</sup> test<br><i>p</i> value |             |
|                                        |                       | Mean (A) ± SE                                                | Mean (B) ± SE                                           |                                                     |                                              |             |
| <i>Transcription &amp; translation</i> |                       |                                                              |                                                         |                                                     |                                              |             |
| GX2970                                 | <i>kis</i>            | 1.04 ± 0.17                                                  | 0.942                                                   | 1.04 ± 0.27                                         | 0.814                                        | 1.00        |
| GX8304                                 | <i>Sin3A</i>          | 1.47 ± 0.22                                                  | 0.457                                                   | 2.17 ± 0.07                                         | 0.097                                        | 1.47        |
| <b>GX21702-1</b>                       | <b><i>sm</i></b>      | 1.31 ± 0.52                                                  | 0.381                                                   | <b>2.32 ± 0.43</b>                                  | <b>0.049</b>                                 | <b>1.76</b> |
| <i>Signal transduction</i>             |                       |                                                              |                                                         |                                                     |                                              |             |
| GX4499                                 | <i>ImpL2</i>          | 1.45 ± 0.17                                                  | 0.492                                                   | 1.43 ± 0.36                                         | 0.424                                        | 0.99        |
| <b>GX47280-1</b>                       | <b><i>SIFR</i></b>    | 0.91 ± 0.43                                                  | 0.533                                                   | <b>4.32 ± 0.30</b>                                  | <b>&lt;0.001</b>                             | <b>4.72</b> |
| GX16168                                | <i>CaplA</i>          | 0.67 ± 0.28                                                  | 0.541                                                   | 0.95 ± 0.02                                         | 0.939                                        | 1.41        |
| EP(2)2612                              | <i>CG8155</i>         | 1.19 ± 0.26                                                  | 0.642                                                   | 1.45 ± 0.16                                         | 0.496                                        | 1.21        |
| <i>Cellular component movement</i>     |                       |                                                              |                                                         |                                                     |                                              |             |
| GX48290                                | <i>Dlc90F</i>         | 1.27 ± 0.11                                                  | 0.671                                                   | 0.82 ± 0.05                                         | 0.793                                        | 0.65        |
| <i>Cellular metabolism</i>             |                       |                                                              |                                                         |                                                     |                                              |             |
| GX8331                                 | <i>CG33138</i>        | 1.24 ± 0.03                                                  | 0.729                                                   | 1.97 ± 0.17                                         | 0.162                                        | 1.59        |
| GX47642-1                              | <i>CG10383</i>        | 1.33 ± 0.06                                                  | 0.632                                                   | 0.98 ± 0.07                                         | 0.912                                        | 0.74        |
| <b>EP(3)1250</b>                       | <b><i>men</i></b>     | 1.58 ± 0.11                                                  | 0.398                                                   | <b>3.00 ± 1.63</b>                                  | <b>0.003</b>                                 | <b>1.90</b> |
| <b>EP(2)2086</b>                       | <b><i>CG30427</i></b> | 1.27 ± 0.11                                                  | 0.674                                                   | <b>2.40 ± 0.14</b>                                  | <b>0.045</b>                                 | <b>1.89</b> |
| <i>Immunity</i>                        |                       |                                                              |                                                         |                                                     |                                              |             |
| GX5503                                 | <i>PGRP-LF</i>        | 1.12 ± 0.05                                                  | 0.857                                                   | 1.05 ± 0.18                                         | 0.795                                        | 0.94        |
| <i>Others</i>                          |                       |                                                              |                                                         |                                                     |                                              |             |
| GX2970-1                               | <i>CG42663</i>        | 1.44 ± 0.06                                                  | 0.845                                                   | 1.33 ± 0.36                                         | 0.484                                        | 0.93        |
| GX47642                                | <i>CG10916</i>        | 0.83 ± 0.06                                                  | 0.805                                                   | 1.09 ± 0.13                                         | 0.815                                        | 1.31        |
