# Supplementary material
Source: PubMed Central journal article supplement (PMC3359393)
Supplement: NIHMS360864-supplement-05.pdf [file NIHMS360864-supplement-05.pdf]

Paik & Jang, Appendix D  
 Supplementary Table 4

| Gene     | Forward               | Reverse               | Product size |
|----------|-----------------------|-----------------------|--------------|
| kismet   | GTCCTGGCACATGCAGTCTC  | TTGAAAGATTGATTTGCGCC  | 277          |
| Sin3A    | TATGAAAGAGCGCGTTTGCT  | CTACACAATCCAGTGCGGCT  | 307          |
| Amph     | ACAACCTCAATCGCCAGCAG  | TCATTTCTGGGAAACTGTCCA | 264          |
| sm       | ACAGAACCAGCAGCAAGCAC  | ACGTTCAATTTCTCCGGCTT  | 327          |
| CG42753  | GCAGTTACGTGCTCGATGGT  | AACGAGAAGACCCCTGCTGT  | 99           |
| Impl2    | GATCGTTTGCGAGATGATGG  | CAGATGCGTCTTCTCGGTGT  | 322          |
| CG14997  | TTTGTGGACGTGACCAGTT   | ACGGGGGTGAGGTTGTAATC  | 309          |
| SIFR     | TCGTAAAGCAGGACTCGGTG  | CCACACAAATGGTGGTTGGT  | 316          |
| hrsomega | AACCCCTGGAAAAGATGTG   | CGCAGGGTATCGACTTTTCA  | 270          |
| CalpA    | GAGGCAGAACTCCTCAGGG   | CACTTTCGCTTGCCACTGTT  | 347          |
| Hts      | ACCACGAGATCACTGCCTCA  | AGCATGTACCACCGAATGGA  | 122          |
| CG8155   | ATCAAGATCCCGACCAGGAG  | GGAAATGGGCAGGATGACTT  | 386          |
| Arf51F   | TGGATGACACATCAGCACCA  | TATCCTATGCAGCTCCGTGC  | 337          |
| Dlc90F   | AGCCAGTTCATTGTGGACGA  | TGGTGTACGACGGCAATCTT  | 400          |
| CG7129   | CCAAGATATCGCAAAAGCCA  | AACGGCGTAAGGAACCACTT  | 266          |
| CG33138  | CACACCATAGATTTCGAGGAT | GTCGATGATCACTGAGGAGT  | 342          |
| CG10383  | ATCCGCCAAATGTCTATCCC  | GTGGCAGCATCGCTAATGTT  | 375          |
| CG10338  | ATCCGCCAAATGTCTATCCC  | GTGGCAGCATCGCTAATGTT  | 349          |
| men      | TGCCGTTATCGTTATCCTCG  | CAGTGCTCCACCTGCTCACT  | 365          |
| CG30427  | GCTCTACTCCTGCCACTCCC  | CGTGGACAAGTGGATGAAGG  | 370          |
| CG3760   | GAGCAGCGCAAGGACTACAG  | CATTGCTGTCCTCATCGTCC  | 272          |
| PGRP-LF  | CGGTTGTGGGTAGTGCGATA  | CATTCGCTGCGATCGAGTAT  | 232          |
| CG42663  | ATAATTTTGC GCGTTTGGTG | TTTCTGGACCAAAGCAACG   | 186          |
| CG10916  | ACCCGATGGCTGAATAGGTC  | CGGTACATAAGGAGCAGGCA  | 290          |
| Dgp-1    | TTGTGTCGGTACATGCCTT   | TGAGATCCTGCGACACCATT  | 202          |
