# Supplementary material
Source: PubMed Central journal article supplement (PMC3359393)

Supplementary Fig. 1

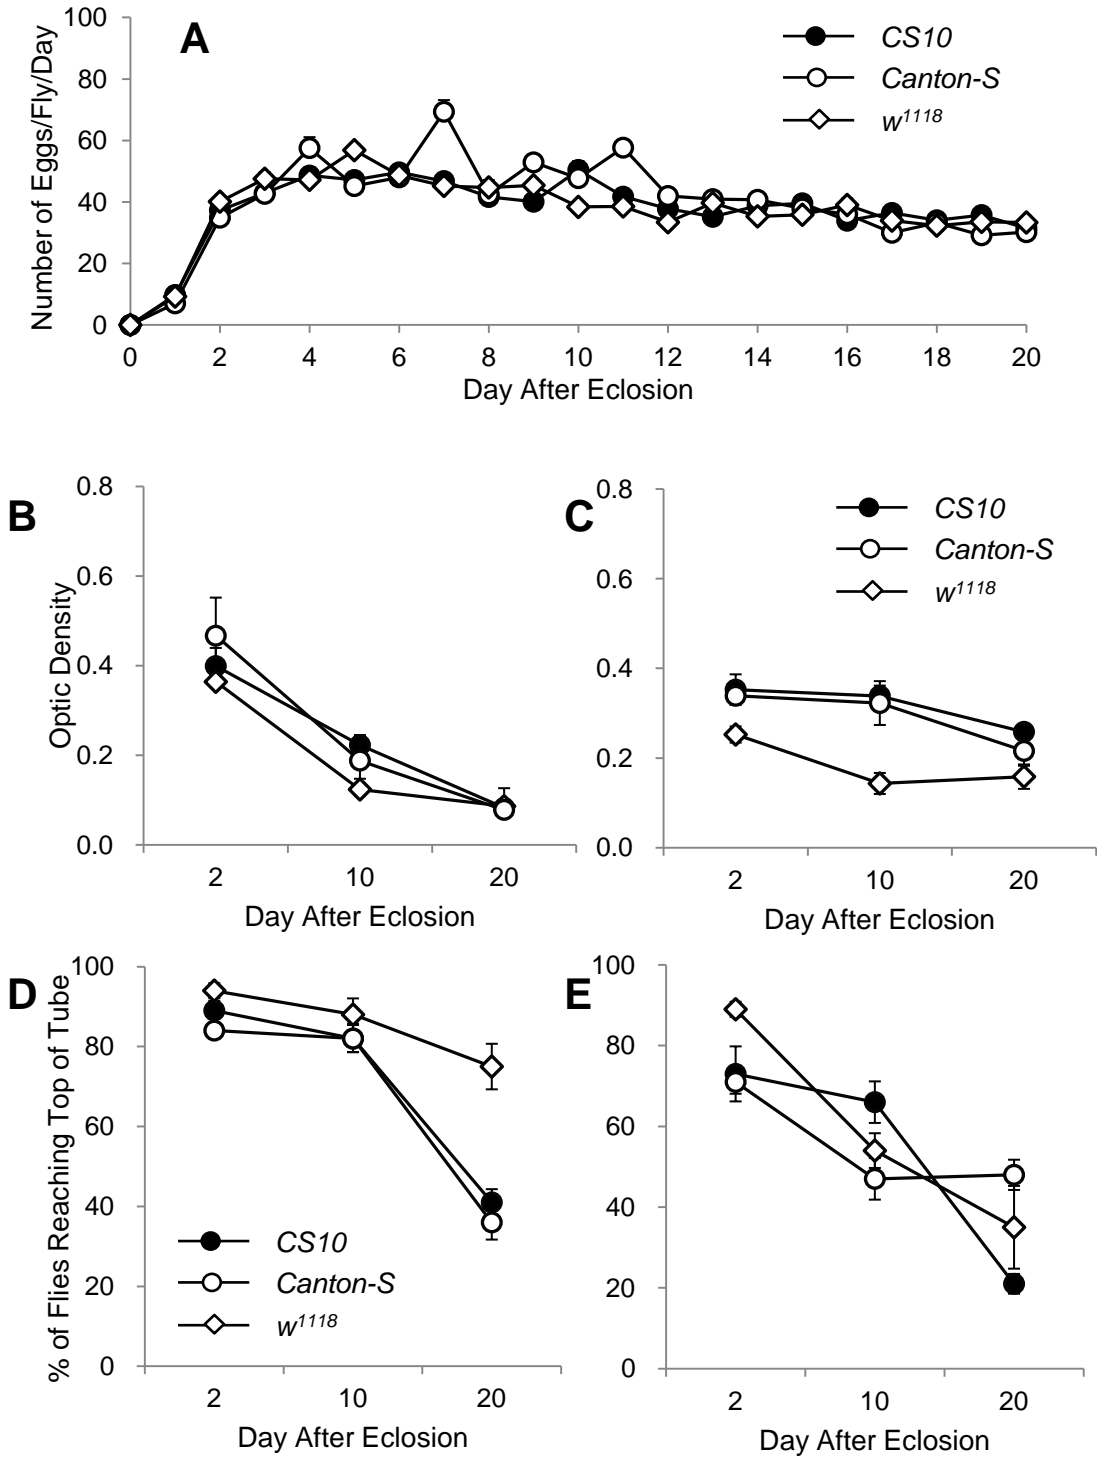

Supplement: NIHMS360864-supplement-01.pdf [file NIHMS360864-supplement-01.pdf]
